# Supplementary material
Source: PubMed Central journal article supplement (PMC8317045)

shRel-B  
Induction (days)

Un 1 2 3 4

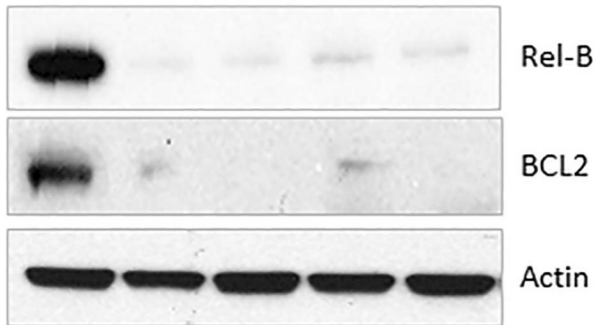

Online Resource 5

Supplement: NIHMS1716151-supplement-Online_resource_5.pdf [file NIHMS1716151-supplement-Online_resource_5.pdf]
